# Supplementary material for: The Cost of War on Public Health: An Exploratory Method for Understanding the Impact of Conflict on Public Health in Sri Lanka
Source: PubMed Central journal article supplement (PMC5231380; doi:10.1371/journal.pone.0166674), 2017-01-12
Supplement: pone.0166674.s001.pdf [file pone.0166674.s001.pdf]

## Appendix 1

| <b>Change in development indicators in country with/without conflict<br/>Comparison of Costa Rica, Malaysia and Sri Lanka 1982 - 2002</b> |                   |                 |                             |                              |
|-------------------------------------------------------------------------------------------------------------------------------------------|-------------------|-----------------|-----------------------------|------------------------------|
| <b>Indicator</b>                                                                                                                          | <b>Costa Rica</b> | <b>Malaysia</b> | <b>Sri Lanka<br/>Actual</b> | <b>Sri Lanka<br/>Fictive</b> |
| <b>IMR 1982</b>                                                                                                                           | 19.4              | 23.5            | 34                          |                              |
| <b>Change in IMR 1983 - 2002</b>                                                                                                          | -8.8              | -14.9           | -15.8                       |                              |
| <b>Average Annual Change</b>                                                                                                              | -0.0234           | -0.0311         | -0.0221                     | -0.02                        |
| <b>GDP per capita 1982 (\$US Constant<br/>2000)</b>                                                                                       | 2733.29           | 2057.94         | 461.37                      |                              |
| <b>% change in GDP/Cap 1983 - 2002</b>                                                                                                    | 0.0243            | 0.0451          | 0.0416                      |                              |
| <b>Maternal Mortality Ratio per</b>                                                                                                       | 33 (2004)         | (30) 2003       | 43 (2003)                   |                              |
| <b>Population 2002</b>                                                                                                                    | 4,083,197         | 24,515,323      | 19,134,096                  |                              |

Source: World Bank 2013
