# Supplementary material for: The Cost of War on Public Health: An Exploratory Method for Understanding the Impact of Conflict on Public Health in Sri Lanka
Source: PubMed Central journal article supplement (PMC5231380; doi:10.1371/journal.pone.0166674), 2017-01-12
Supplement: pone.0166674.s002.pdf [file pone.0166674.s002.pdf]

Appendix 2 Sensitivity analysis for district level outcomes

MMR Sensitivity Analysis

The table depicts: "The actual outcome is XXXX compared to the projected outcome"

|                 | NATIONAL   |             |        |        |              | CENTRAL           |        | EASTERN            |              |             | NORTH CENTRAL |          | NORTH WESTERN |             | NORTHERN      |                 |            | Sabaragamuwa |         | SOUTHERN |        |          | UVA     |          | WESTERN |         |           |
|-----------------|------------|-------------|--------|--------|--------------|-------------------|--------|--------------------|--------------|-------------|---------------|----------|---------------|-------------|---------------|-----------------|------------|--------------|---------|----------|--------|----------|---------|----------|---------|---------|-----------|
|                 | 5 yr trend | 10 yr trend | Kandy  | Matale | Nuwara Eliya | Batticaloa (1999) | Ampara | Trincomalee (1999) | Anuradhapura | Polonnaruwa | Kurunegala    | Puttalam | Jaffna        | Kilinochchi | Mannar (1999) | Vavuniya (1996) | Mullaitivu | Ratnapura    | Kegalle | Galle    | Matara | Hambanto | Badulla | Moneraga | Colombo | Gampaha | Kaluthara |
| Linear          | Worse      | Better      | Better | Better | Worse        | Better            | Worse  | Better             | Worse        | Worse       | Better        | Worse    | Worse         | Worse       | n/a           | Worse           | Better     | n/a          | Worse   | Worse    | Better | Better   | Worse   | Better   | Worse   | n/a     | Better    |
| Exponential     | Worse      | Worse       | Better | Better | Worse        | Better            | Worse  | Better             | Worse        | Worse       | Better        | Worse    | Worse         | Worse       | Worse         | Better          | Worse      | Worse        | Worse   | Worse    | Better | Better   | Worse   | Better   | Worse   | Worse   | Better    |
| Log             | Worse      | Better      | Better | Better | Worse        | Better            | Better | Worse              | Worse        | Better      | Worse         | Worse    | Worse         | Worse       | Better        | Better          | Worse      | Worse        | Worse   | Worse    | Better | Better   | Worse   | Better   | Worse   | Worse   | Better    |
| <b>OUTCOMES</b> | C          | I           | C      | C      | C            | C                 | I      | C                  | C            | C           | I             | C        | C             | C           | I             | I               | C          | I            | I       | C        | C      | I        | C       | C        | C       | C       | C         |

IMR Sensitivity Analysis

This table depicts: "The actual outcome is XXX compared to the projected outcome"

|                 | NATIONAL   |             |        |        |              | CENTRAL    |        | EASTERN     |              |             | NORTH CENTRAL |          | NORTH WESTERN |             | NORTHERN |                |            | Sabaragamuwa |         | SOUTHERN |        |          | UVA     |          | WESTERN |         |           |        |
|-----------------|------------|-------------|--------|--------|--------------|------------|--------|-------------|--------------|-------------|---------------|----------|---------------|-------------|----------|----------------|------------|--------------|---------|----------|--------|----------|---------|----------|---------|---------|-----------|--------|
|                 | 5 yr trend | 10 yr trend | Kandy  | Matale | Nuwara Eliya | Batticaloa | Ampara | Trincomalee | Anuradhapura | Polonnaruwa | Kurunegala    | Puttalam | Jaffna        | Kilinochchi | Mannar   | Vauniya (1996) | Mullaitivu | Ratnapura    | Kegalle | Galle    | Matara | Hambanto | Badulla | Moneraga | Colombo | Gampaha | Kaluthara |        |
| Linear          | Worse      | Better      | Worse  | Worse  | Better       | Worse      | Worse  | Better      | Worse        | Worse       | Better        | Better   | Better        | n/a         | Better   | n/a            | n/a        | Better       | Worse   | Worse    | Better | Better   | Worse   | Worse    | Worse   | n/a     | n/a       | Better |
| Exponential     | Better     | Better      | Worse  | Worse  | Worse        | Worse      | Worse  | Better      | Worse        | Worse       | Worse         | Better   | Better        | Better      | n/a      | Better         | n/a        | n/a          | Worse   | Worse    | Better | Better   | Worse   | Worse    | Better  | n/a     | n/a       | Worse  |
| Log             | Better     | Worse       | Better | Better | Better       | Worse      | Worse  | Better      | Worse        | Worse       | Better        | Better   | Better        | n/a         | Better   | n/a            | n/a        | Better       | Better  | Better   | Better | Better   | Worse   | Better   | Worse   | n/a     | n/a       | Better |
| <b>OUTCOMES</b> | I          | I           | I      | I      | I            | C          | C      | C           | C            | C           | I             | C        | C             | C           | C        | n/a            | C          | I            | I       | C        | C      | I        | I       | I        | I       | I       | I         | I      |

C = Consistent

I = Inconsistent One of the two alternatives matched the linear model

D = disagreement; neither alternative matched linear model

C = Consistent
